# Supplementary material for: Host immunogenetic variation and metagenomically- derived gut microbiome functionality in a wild vertebrate population
Source: Research Square preprint supplement (doi:10.21203/rs.3.rs-6790233/v1), 2025-06-17
Supplement: Supplementary file 1 [file 3955416f0d8af29511abfe2e.docx]

# Supplementary materials for:

# Host immunogenetic variation and metagenomically-derived gut microbiome functionality in a wild vertebrate population

Chuen Zhang Lee1,2*, Sarah F. Worsley1, Jan Komdeur3, Falk Hildebrand4,5, Hannah L. Dugdale3, David S. Richardson1,6*

1 School of Biological Sciences, University of East Anglia, Norwich, Norfolk, UK

2 Centre for Microbial Interactions, Norwich Research Park, Norwich, Norfolk, UK

3 Groningen Institute for Evolutionary Life Sciences (GELIFES), University of Groningen, Groningen, The Netherlands

4 Quadram Institute Bioscience, Norwich Research Park, Norfolk, UK

5 Earlham Institute, Norwich Research Park, Norfolk, UK

6 Nature Seychelles, Roche Caiman, Mahé, Republic of Seychelles

*Correspondence: david.richardson@uea.ac.uk, chuen.lee@uea.ac.uk

**Supplementary tables**

Table S1. The relationship between gut microbiome alpha diversity (Shannon) and variation in host (A) MHC diversity and (B) the presence/absence of specific MHC alleles in Seychelles warblers. Linear mixed models were used for all models. N = 253 samples from 149 individuals in 16S ASV diversity and N = 99 samples from 57 individuals in metagenomic taxonomy diversity and functional diversity. Reference categories for categorical variables were as follows: Female (sex), winter (season), 2017 (Sample year), and absent (0) in all MHC alleles. Significant (P < 0.05) variables are shown in bold.

| Model | Predictor | 16S ASV Shannon | | | | | Metagenomics Taxonomy Shannon | | | | | Metagenomics Functional Shannon | | | | |
| --- | --- | --- | --- | --- | --- | --- | --- | --- | --- | --- | --- | --- | --- | --- | --- | --- |
| A) MHC Diversity | Est | SE | df | t | P | Est | SE | df | t | P | Est | SE | df | t | P |
| (Intercept) | **3.256** | **0.609** | **151.658** | **5.344** | **< 0.001** | 0.707 | 0.843 | 51.987 | 0.838 | 0.406 | 810.308 | 458.228 | 63.471 | 1.768 | 0.082 |
| Heterozygosity | 0.035 | 0.400 | 127.858 | 0.087 | 0.931 | 0.549 | 0.529 | 43.259 | 1.039 | 0.304 | 84.219 | 284.505 | 56.648 | 0.296 | 0.768 |
| MHC-I Diversity | 0.043 | 0.059 | 126.354 | 0.726 | 0.470 | 0.056 | 0.079 | 39.364 | 0.705 | 0.485 | 18.886 | 41.001 | 47.343 | 0.461 | 0.647 |
| MHC-II Diversity | -0.038 | 0.085 | 107.453 | -0.444 | 0.658 | -0.106 | 0.101 | 36.388 | -1.043 | 0.304 | -8.708 | 54.004 | 49.176 | -0.161 | 0.873 |
| Age | -0.026 | 0.034 | 167.775 | -0.742 | 0.459 | -0.015 | 0.040 | 54.211 | -0.383 | 0.703 | -41.418 | 22.222 | 64.476 | -1.864 | 0.067 |
| Season | -0.152 | 0.218 | 232.175 | -0.698 | 0.486 | 0.002 | 0.246 | 81.629 | 0.007 | 0.994 | 147.236 | 147.488 | 69.650 | 0.998 | 0.322 |
| Sex | -0.276 | 0.164 | 116.709 | -1.677 | 0.096 | 0.204 | 0.217 | 37.363 | 0.941 | 0.353 | 4.794 | 113.824 | 47.563 | 0.042 | 0.967 |
| Days in fridge | -0.084 | 0.177 | 237.601 | -0.475 | 0.635 | -0.235 | 0.191 | 65.090 | -1.232 | 0.222 | 30.756 | 124.123 | 75.900 | 0.248 | 0.805 |
| Catch Time | -0.023 | 0.159 | 238.584 | -0.145 | 0.885 | 0.112 | 0.188 | 74.829 | 0.594 | 0.554 | 79.915 | 117.418 | 78.638 | 0.681 | 0.498 |
| SampleYear2018 | 0.168 | 0.237 | 232.771 | 0.710 | 0.478 | 0.216 | 0.299 | 81.766 | 0.721 | 0.473 | 95.562 | 172.637 | 76.217 | 0.554 | 0.582 |
| SampleYear2019 | -0.092 | 0.306 | 238.742 | -0.301 | 0.764 | -0.188 | 0.397 | 79.019 | -0.473 | 0.637 | 90.988 | 238.156 | 78.404 | 0.382 | 0.704 |
| SampleYear2020 | 0.488 | 0.393 | 232.913 | 1.243 | 0.215 | 0.353 | 0.482 | 75.198 | 0.733 | 0.466 | -75.215 | 292.792 | 78.329 | -0.257 | 0.798 |
| SampleYear2021 | -0.179 | 0.300 | 238.987 | -0.597 | 0.551 | 0.074 | 0.375 | 67.298 | 0.198 | 0.844 | 84.213 | 237.966 | 75.655 | 0.354 | 0.724 |
| SampleYear2022 | 0.114 | 0.292 | 232.157 | 0.391 | 0.696 | 0.270 | 0.347 | 81.205 | 0.778 | 0.439 | 285.653 | 202.309 | 76.433 | 1.412 | 0.162 |
| SampleYear2023 |  |  |  |  |  | 0.425 | 0.391 | 81.858 | 1.087 | 0.280 | 133.373 | 243.410 | 78.918 | 0.548 | 0.585 |
| B) Presence/absence of MHC alleles | (Intercept) | **3.770** | **0.643** | **133.977** | **5.864** | **< 0.001** | **1.262** | **0.314** | **82.917** | **4.018** | **< 0.001** | **1024.450** | **184.100** | **80.340** | **5.565** | **< 0.001** |
| Heterozygosity | **0.119** | **0.411** | **111.652** | **0.291** | **0.772** |  |  |  |  |  |  |  |  |  |  |
| *Ase-dab3* | 0.306 | 0.289 | 142.300 | 1.061 | 0.290 |  |  |  |  |  |  |  |  |  |  |
| *Ase-dab4* | -0.288 | 0.301 | 126.639 | -0.958 | 0.340 |  |  |  |  |  |  |  |  |  |  |
| *Ase-dab5* | -0.031 | 0.304 | 146.426 | -0.103 | 0.918 |  |  |  |  |  |  |  |  |  |  |
| *Ase-ua1* | 0.153 | 0.360 | 123.331 | 0.424 | 0.672 |  |  |  |  |  |  |  |  |  |  |
| *Ase-ua3* | -0.332 | 0.370 | 122.950 | -0.898 | 0.371 |  |  |  |  |  |  |  |  |  |  |
| *Ase-ua4* | -0.277 | 0.276 | 107.669 | -1.005 | 0.317 |  |  |  |  |  |  |  |  |  |  |
| *Ase-ua5* | -0.240 | 0.348 | 133.132 | -0.690 | 0.491 |  |  |  |  |  |  |  |  |  |  |
| *Ase-ua6* | -0.004 | 0.342 | 140.968 | -0.012 | 0.991 |  |  |  |  |  |  |  |  |  |  |
| *Ase-ua7* | -0.272 | 0.401 | 118.988 | -0.679 | 0.499 |  |  |  |  |  |  |  |  |  |  |
| *Ase-ua8* | 0.004 | 0.284 | 127.433 | 0.013 | 0.990 |  |  |  |  |  |  |  |  |  |  |
| *Ase-ua9* | -0.188 | 0.337 | 115.587 | -0.557 | 0.579 |  |  |  |  |  |  |  |  |  |  |
| *Ase-ua11* | 0.494 | 0.363 | 115.143 | 1.359 | 0.177 | 0.199 | 0.203 | 41.077 | 0.977 | 0.334 | -60.530 | 103.310 | 48.260 | -0.586 | 0.561 |
| Age | -0.027 | 0.036 | 170.485 | -0.753 | 0.453 | -0.034 | 0.039 | 59.801 | -0.857 | 0.395 | -41.700 | 21.230 | 64.560 | -1.964 | 0.054 |
| Season | -0.208 | 0.222 | 223.919 | -0.939 | 0.349 | -0.010 | 0.243 | 83.916 | -0.040 | 0.968 | 125.180 | 141.490 | 70.070 | 0.885 | 0.379 |
| Sex | -0.268 | 0.171 | 114.037 | -1.565 | 0.120 | 0.102 | 0.210 | 42.108 | 0.487 | 0.628 | -8.360 | 107.100 | 48.910 | -0.078 | 0.938 |
| Days in fridge | -0.155 | 0.179 | 228.097 | -0.866 | 0.387 | -0.264 | 0.187 | 67.914 | -1.406 | 0.164 | 12.680 | 121.900 | 78.130 | 0.104 | 0.917 |
| Catch Time | 0.045 | 0.161 | 228.854 | 0.279 | 0.780 | 0.123 | 0.187 | 75.298 | 0.658 | 0.513 | 88.540 | 115.770 | 80.730 | 0.765 | 0.447 |
| SampleYear2018 | 0.147 | 0.238 | 226.562 | 0.615 | 0.539 | 0.242 | 0.299 | 83.252 | 0.810 | 0.420 | 79.380 | 171.340 | 78.680 | 0.463 | 0.644 |
| SampleYear2019 | -0.099 | 0.306 | 228.897 | -0.325 | 0.746 | -0.173 | 0.392 | 80.974 | -0.440 | 0.661 | 94.310 | 232.050 | 79.830 | 0.406 | 0.686 |
| SampleYear2020 | 0.479 | 0.398 | 226.558 | 1.203 | 0.230 | 0.331 | 0.478 | 76.291 | 0.693 | 0.491 | -99.300 | 288.020 | 80.150 | -0.345 | 0.731 |
| SampleYear2021 | -0.164 | 0.304 | 228.678 | -0.538 | 0.591 | 0.205 | 0.370 | 69.594 | 0.553 | 0.582 | 99.280 | 232.440 | 78.440 | 0.427 | 0.671 |
| SampleYear2022 | 0.087 | 0.300 | 218.106 | 0.291 | 0.771 | 0.333 | 0.346 | 83.825 | 0.964 | 0.338 | 283.560 | 198.730 | 78.970 | 1.427 | 0.158 |
| SampleYear2023 |  |  |  |  |  | 0.514 | 0.388 | 83.636 | 1.325 | 0.189 | 141.400 | 234.950 | 80.630 | 0.602 | 0.549 |

Table S2. Differentially abundant eggNOG members with increasing MHC-I Diversity in the gut microbiome of the Seychelles warblers (n = 99 from 57 birds).

| eggNOG members | Direction of log fold change | Annotation | Category |
| --- | --- | --- | --- |
| COG0008 | Negative | Glutamyl- or glutaminyl-tRNA synthetase | J |
| COG0028 | Negative | Acetolactate synthase large subunit or other thiamine pyrophosphate-requiring enzyme | E H |
| COG0085 | Negative | DNA-directed RNA polymerase, beta subunit/140 kD subunit | K |
| COG0258 | Negative | 5'-3' exonuclease Xni/ExoIX (flap endonuclease) | L |
| COG0318 | Negative | O-succinylbenzoic acid-CoA ligase MenE or related acyl-CoA synthetase (AMP-forming) | I |
| COG0443 | Negative | Molecular chaperone DnaK (HSP70) | O |
| COG0477 | Negative | MFS family permease, includes anhydromuropeptide permease AmpG | G E P R |
| COG0488 | Negative | ATPase components of ABC transporters with duplicated ATPase domains | R |
| COG0507 | Negative | ATPase/5'-3' helicase helicase subunit RecD of the DNA repair enzyme RecBCD (exonuclease V) | L |
| COG0513 | Negative | Superfamily II DNA and RNA helicase | L |
| COG0515 | Negative | Serine/threonine protein kinase | T |
| COG0524 | Negative | Sugar or nucleoside kinase, ribokinase family | G |
| COG0577 | Positive | ABC-type antimicrobial peptide transport system, permease component | V |
| COG0628 | Positive | Predicted PurR-regulated permease PerM | R |
| COG0642 | Positive | Signal transduction histidine kinase | T |
| COG0697 | Negative | Permease of the drug/metabolite transporter (DMT) superfamily | G E R |
| COG0745 | Positive | DNA-binding response regulator, OmpR family, contains REC and winged-helix (wHTH) domain | K T |
| COG0841 | Positive | Multidrug efflux pump subunit AcrB | V |
| COG0845 | Positive | Multidrug efflux pump subunit AcrA (membrane-fusion protein) | V M |
| COG1502 | Negative | Phosphatidylserine/phosphatidylglycerophosphate/cardiolipin synthase | I |
| COG2911 | Positive | Phospholipid transport to the outer membrane protein TamB | M |
| COG3209 | Positive | Uncharacterized conserved protein RhaS, contains 28 RHS repeats | R |
| COG4886 | Negative | Leucine-rich repeat (LRR) protein | K |
| COG4974 | Positive | Site-specific recombinase XerD | L |
